# Supplementary material
Source: publisher figshare collection journal article supplement (https://springernature.figshare.com/ndownloader/files/21593430)
Supplement: Supplementary file 1 [file 21593430]

## **Additional file of Suemoto et al., (2020)**

Figure S1: S-wave velocity structure without correction for topography

Figure S2: S-wave velocity perturbation with different smoothing parameters

Figure S3: S-wave velocity perturbation with different damping parameters

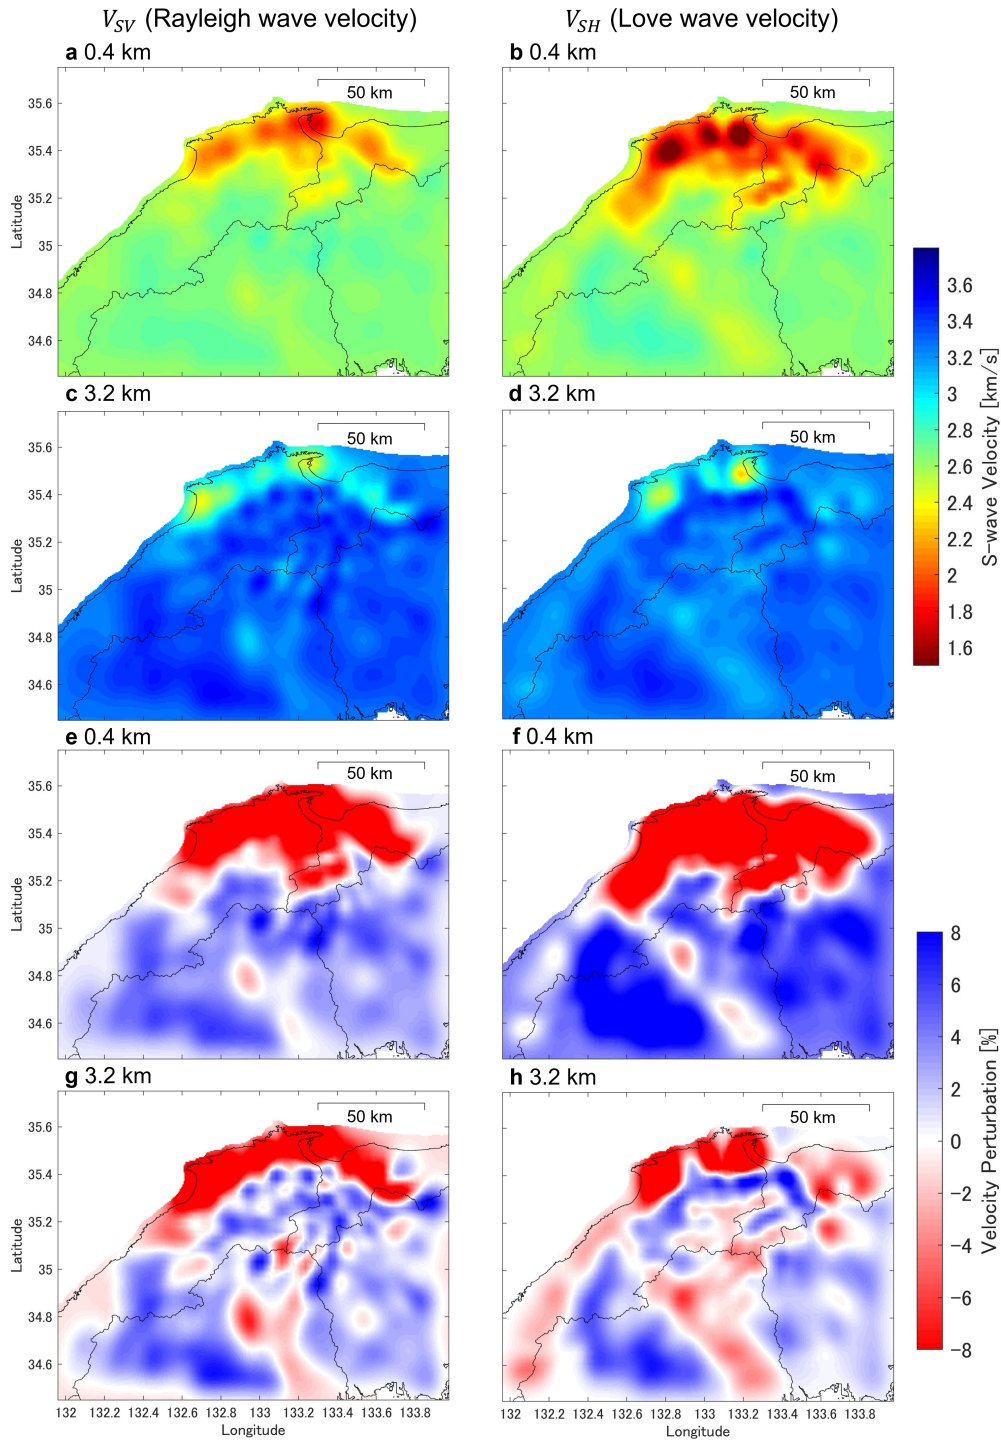

**Fig. S1** Absolute S-wave velocity values and their perturbation from the velocity average in lateral S-wave velocity slices at 0.4 km and 3.2 km depth from the surface (without correction for topography). **a, c, e** and **g** Rayleigh wave results; **b, d, f,** and **h** Love wave results. In each panel, black lines show prefecture borders, and the depth is shown above the upper left corner

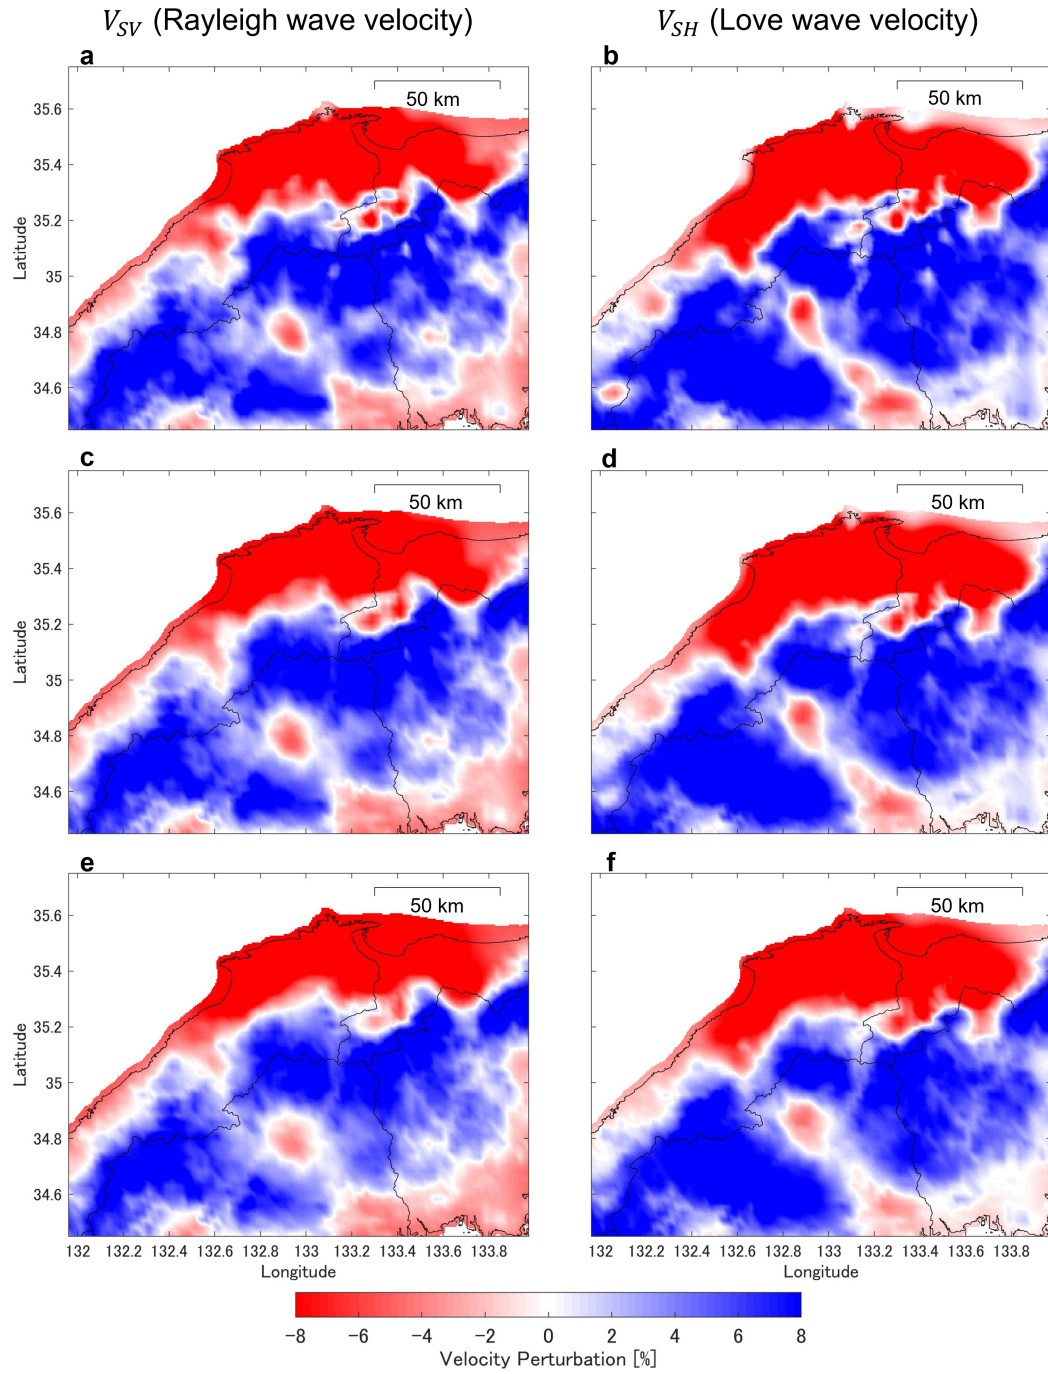

**Fig. S2** S-wave velocity perturbation from the velocity average in lateral S-wave velocity slices at 0.5 km depth for different smoothing parameter strengths. **a, b** Half-strength smoothing parameters, relative to the results shown in Fig. 6. **c, d** Same strength. **e, f** Twofold strength

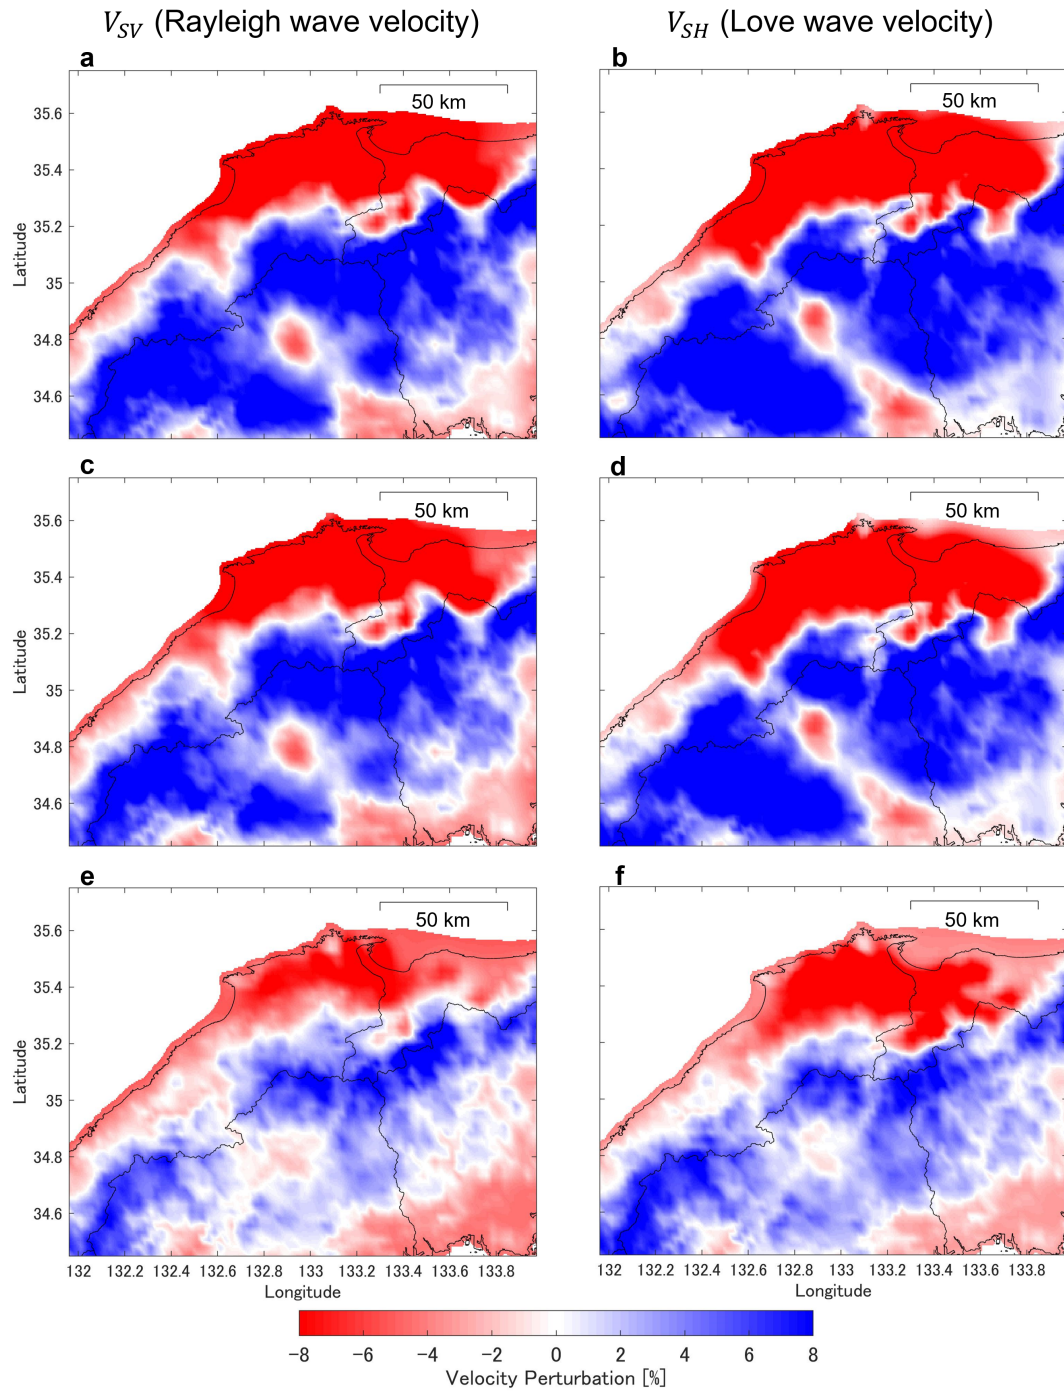

**Fig. S3** S-wave velocity perturbation from the velocity average in lateral S-wave velocity slices at 0.5 km depth for different damping parameter strengths. **a, b** One-tenth strength, relative to the results shown in Fig. 6. **c, d** Same strength. **e, f** Tenfold strength
